# Supplementary material
Source: Springer Nature journal article supplement (https://www.springermedizin.de/resource/supplementary/12876_2012_903_MOESM1_ESM.pdf/9438018)

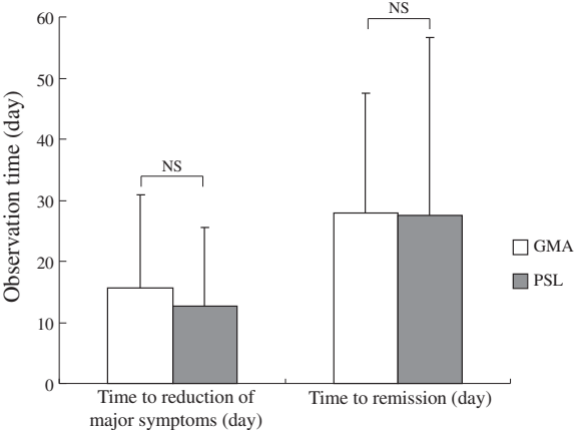

Supplement: MOESM1 [file 9438018]
